# Supplementary material
Source: PubMed Central journal article supplement (PMC4656745)
Supplement: ajcr0005-3241-f2.pdf [file ajcr0005-3241-f2.pdf]

## CHRNA5 and lung cancer risk in smokers

**Supplemental Table 1.** Basic information of *CHRNA5* SNPs in this study

| SNP ID     | Position | Allele            | MAF   |         | HWE     | ORs   | 95% CI |       | Allele                |
|------------|----------|-------------------|-------|---------|---------|-------|--------|-------|-----------------------|
|            |          | A <sup>a</sup> /B | Case  | Control | p-value |       |        |       | p <sup>b</sup> -value |
| rs2277550  | 78858263 | A/C               | 0.015 | 0.018   | 0.747   | 0.838 | 0.322  | 2.178 | 0.716                 |
| rs684513   | 78858400 | G/C               | 0.25  | 0.286   | 0.333   | 0.833 | 0.632  | 1.098 | 0.195                 |
| rs7178897  | 78862975 | C/T               | 0.062 | 0.061   | 0.063   | 1.004 | 0.605  | 1.666 | 0.989                 |
| rs667282   | 78863472 | C/T               | 0.447 | 0.487   | 0.279   | 0.854 | 0.669  | 1.09  | 0.204                 |
| rs16969948 | 78864786 | G/A               | 0.064 | 0.055   | 0.314   | 1.171 | 0.7    | 1.959 | 0.547                 |
| rs588765   | 78865425 | T/C               | 0.219 | 0.188   | 0.544   | 1.216 | 0.899  | 1.644 | 0.204                 |
| rs16969949 | 78866964 | T/C               | 0.061 | 0.056   | 0.966   | 1.093 | 0.653  | 1.83  | 0.736                 |
| rs12903839 | 78867042 | G/C               | 0.009 | 0.005   | 0.931   | 1.775 | 0.395  | 7.97  | 0.707                 |
| rs17486278 | 78867482 | C/A               | 0.272 | 0.27    | 0.799   | 1.01  | 0.768  | 1.328 | 0.944                 |
| rs1875869  | 78868157 | T/A               | 0.061 | 0.056   | 0.966   | 1.093 | 0.653  | 1.83  | 0.736                 |
| rs601079   | 78869579 | A/T               | 0.281 | 0.246   | 0.321   | 1.197 | 0.908  | 1.578 | 0.201                 |
| rs495956   | 78869930 | G/A               | 0.271 | 0.238   | 0.528   | 1.193 | 0.902  | 1.577 | 0.216                 |
| rs680244   | 78871288 | A/G               | 0.281 | 0.248   | 0.642   | 1.181 | 0.897  | 1.556 | 0.236                 |
| rs7180002  | 78873993 | T/A               | 0.033 | 0.032   | 0.572   | 1.044 | 0.524  | 2.077 | 0.903                 |
| rs692780   | 78876505 | G/C               | 0.228 | 0.199   | 0.707   | 1.187 | 0.882  | 1.596 | 0.257                 |
| rs11637635 | 78877150 | A/G               | 0.208 | 0.179   | 0.788   | 1.204 | 0.885  | 1.637 | 0.237                 |
| rs951266   | 78878541 | T/C               | 0.033 | 0.035   | 0.531   | 0.941 | 0.48   | 1.847 | 0.86                  |
| rs10519205 | 78878791 | C/T               | 0.059 | 0.054   | 0.872   | 1.114 | 0.658  | 1.888 | 0.687                 |
| rs555018   | 78879242 | C/T               | 0.221 | 0.188   | 0.544   | 1.231 | 0.911  | 1.664 | 0.176                 |
| rs12903575 | 78881087 | A/G               | 0.009 | 0.01    | 0.861   | 0.876 | 0.246  | 3.123 | 0.907                 |
| rs17408276 | 78881618 | C/T               | 0.231 | 0.189   | 0.856   | 1.292 | 0.956  | 1.746 | 0.095                 |
| rs16969968 | 78882925 | A/G               | 0.044 | 0.035   | 0.278   | 1.269 | 0.679  | 2.371 | 0.454                 |

<sup>a</sup>Minor allele; <sup>b</sup>p values were calculated from two-sided chi-square tests or Fisher's exact tests for either allele frequency. Abbreviations: OR, odd ratio; CI, confidence interval; HWE, Hardy-Weinberg equilibrium; MAF, minor allele frequency.

CHRNA5 and lung cancer risk in smokers

**Supplemental Table 2.** Basic information of CHRNA5 SNPs in nonsmokersubpopulation

| SNP ID     | Position | Alleles           |  | Frequency |         | H-W<br><i>p</i> -value | ORs   | 95% CI |       | Allele<br><i>p</i> <sup>b</sup> -value |        |       |
|------------|----------|-------------------|--|-----------|---------|------------------------|-------|--------|-------|----------------------------------------|--------|-------|
|            |          | A <sup>a</sup> /B |  | Case      | Control |                        |       | lower  | upper |                                        |        |       |
| rs10519205 | 78878791 | C/T               |  | 0.056     | 0.944   | 0.060                  | 0.940 | 0.764  | 0.915 | 0.386                                  | 2.169  | 0.841 |
| rs12903839 | 78867042 | G/C               |  | 0.008     | 0.992   | 0.005                  | 0.995 | 0.945  | 1.672 | 0.150                                  | 18.594 | 0.792 |
| rs16969948 | 78864786 | G/A               |  | 0.063     | 0.937   | 0.062                  | 0.938 | 0.339  | 1.027 | 0.453                                  | 2.330  | 0.948 |
| rs17408276 | 78881618 | C/T               |  | 0.222     | 0.778   | 0.199                  | 0.801 | 0.369  | 1.153 | 0.710                                  | 1.874  | 0.564 |
| rs17486278 | 78867482 | C/A               |  | 0.246     | 0.754   | 0.255                  | 0.745 | 0.618  | 0.955 | 0.602                                  | 1.514  | 0.843 |
| rs495956   | 78869930 | G/A               |  | 0.246     | 0.754   | 0.260                  | 0.740 | 0.137  | 0.931 | 0.588                                  | 1.475  | 0.761 |
| rs601079   | 78869579 | A/T               |  | 0.254     | 0.746   | 0.267                  | 0.733 | 0.082  | 0.936 | 0.594                                  | 1.477  | 0.777 |
| rs680244   | 78871288 | A/G               |  | 0.254     | 0.746   | 0.271                  | 0.729 | 0.226  | 0.914 | 0.580                                  | 1.440  | 0.698 |
| rs7180002  | 78873993 | T/A               |  | 0.032     | 0.968   | 0.026                  | 0.974 | 0.697  | 1.219 | 0.381                                  | 3.897  | 0.981 |
| rs951266   | 78878541 | T/C               |  | 0.032     | 0.968   | 0.029                  | 0.971 | 0.670  | 1.115 | 0.353                                  | 3.519  | 0.908 |
| rs16969968 | 78882925 | A/G               |  | 0.048     | 0.952   | 0.031                  | 0.969 | 0.066  | 1.565 | 0.583                                  | 4.207  | 0.371 |
| rs1875869  | 78868157 | T/A               |  | 0.056     | 0.944   | 0.064                  | 0.936 | 0.880  | 0.856 | 0.364                                  | 2.016  | 0.722 |
| rs667282   | 78863472 | C/T               |  | 0.492     | 0.508   | 0.481                  | 0.519 | 0.134  | 1.045 | 0.702                                  | 1.557  | 0.827 |
| rs11637635 | 78877150 | A/G               |  | 0.190     | 0.810   | 0.195                  | 0.805 | 0.379  | 0.970 | 0.585                                  | 1.609  | 0.906 |
| rs12903575 | 78881087 | A/G               |  | 0.008     | 0.992   | 0.010                  | 0.990 | 0.889  | 0.832 | 0.092                                  | 7.512  | 0.712 |
| rs16969949 | 78866964 | T/C               |  | 0.056     | 0.944   | 0.064                  | 0.936 | 0.880  | 0.856 | 0.364                                  | 2.016  | 0.722 |
| rs2277550  | 78858263 | A/C               |  | 0.016     | 0.984   | 0.017                  | 0.983 | 0.806  | 0.952 | 0.195                                  | 4.640  | 0.736 |
| rs684513   | 78858400 | G/C               |  | 0.310     | 0.690   | 0.274                  | 0.726 | 0.258  | 1.189 | 0.770                                  | 1.836  | 0.435 |
| rs555018   | 78879242 | C/T               |  | 0.206     | 0.794   | 0.202                  | 0.798 | 0.266  | 1.025 | 0.626                                  | 1.677  | 0.923 |
| rs588765   | 78865425 | T/C               |  | 0.198     | 0.802   | 0.202                  | 0.798 | 0.266  | 0.976 | 0.593                                  | 1.606  | 0.922 |
| rs7178897  | 78862975 | C/T               |  | 0.063     | 0.937   | 0.071                  | 0.929 | 0.045# | 0.881 | 0.393                                  | 1.975  | 0.759 |
| rs692780   | 78876505 | G/C               |  | 0.206     | 0.794   | 0.217                  | 0.783 | 0.376  | 0.940 | 0.576                                  | 1.534  | 0.804 |

#Site with HWE  $p \leq 0.05$  is excluded; <sup>a</sup>Minor allele; <sup>b</sup>*p* values were calculated from two-sided chi-square tests or Fisher's exact tests for either allele frequency. Abbreviations: OR, odd ratio; CI, confidence interval; HWE, Hardy-Weinberg equilibrium.

**Supplemental Table 3.** Analysis of SNP distribution and models in the smoking versus nonsmoking-subpopulations

| SNP      | Model         | Genotype | Smoking subpopulation    |                 | Nonsmoking subpopulation |                 |
|----------|---------------|----------|--------------------------|-----------------|--------------------------|-----------------|
|          |               |          | OR <sup>a</sup> (95% CI) | <i>p</i> -value | OR <sup>a</sup> (95% CI) | <i>p</i> -value |
| rs495956 | Co-dominant   | A/A      | 1.00                     | 0.057           | 1.00                     | 0.82            |
|          |               | G/A      | 1.98 (1.03-7.9)          |                 | 0.85 (0.44-1.67)         |                 |
|          |               | G/G      | 2.56 (0.75-8.75)         |                 | 1.21 (0.35-4.24)         |                 |
|          | Dominant      | A/A      | 1.00                     | 0.018*          | 1.00                     | 0.75            |
|          |               | G/A-G/G  | 2.07 (1.12-3.82)         |                 | 0.90 (0.48-1.70)         |                 |
|          | Recessive     | A/A-G/A  | 1.00                     | 0.24            | 1.00                     | 0.68            |
|          |               | G/G      | 2.04 (0.61-6.83)         |                 | 1.30 (0.38-4.40)         |                 |
|          | Over-dominant | A/A-G/G  | 1.00                     | 0.068           | 1.00                     | 0.59            |
|          |               | G/A      | 1.80 (0.95-3.40)         |                 | 0.83 (0.43-1.61)         |                 |
|          | Log-additive  |          | 1.77 (1.08-2.89)         | 0.019           | 0.98 (0.59-1.63)         | 0.93            |
| rs601079 | Co-dominant   | T/T      | 1.00                     | 0.07            | 1.00                     | 0.39            |
|          |               | A/T      | 1.89 (1.00-3.58)         |                 | 0.72 (0.37-1.42)         |                 |
|          |               | A/A      | 2.57 (0.75-8.78)         |                 | 1.62 (0.48-5.44)         |                 |
|          | Dominant      | T/T      | 1.00                     | 0.024*          | 1.00                     | 0.55            |
|          |               | A/T-A/A  | 1.99 (1.09-3.64)         |                 | 0.82 (0.44-1.56)         |                 |
|          | Recessive     | T/T-A/T  | 1.00                     | 0.24            | 1.00                     | 0.31            |
|          |               | A/A      | 2.04 (0.61-6.84)         |                 | 1.85 (0.57-6.04)         |                 |

CHRNA5 and lung cancer risk in smokers

|               |               |                  |                   |                  |                  |      |
|---------------|---------------|------------------|-------------------|------------------|------------------|------|
| rs680244      | Over-dominant | T/T-A/A          | 1.00              | 0.087            | 1.00             | 0.25 |
|               |               | A/T              | 1.72 (0.92-3.20)  |                  | 0.68 (0.35-1.32) |      |
|               | Log-additive  |                  | 1.74 (1.07-2.82)  | 0.023            | 0.98 (0.59-1.64) | 0.95 |
|               |               | Co-dominant      | G/G               | 1.00             | 0.056            | 1.00 |
|               | G/A           |                  | 1.98 (1.04-3.78)  |                  | 0.73 (0.37-1.43) |      |
|               | A/A           |                  | 2.56 (0.75-8.74)  |                  | 1.52 (0.46-5.00) |      |
|               | Dominant      | G/G              | 1.00              | 0.018*           | 1.00             | 0.55 |
|               |               | G/A-A/A          | 2.07 (1.12-3.81)  |                  | 0.82 (0.44-1.56) |      |
|               | Recessive     | G/G-G/A          | 1.00              | 0.25             | 1.00             | 0.36 |
|               |               | A/A              | 2.01 (0.60-6.72)  |                  | 1.74 (0.54-5.53) |      |
| rs588765      | Over-dominant | G/G-A/A          | 1.00              | 0.065            | 1.00             | 0.27 |
|               |               | G/A              | 1.80 (0.96-3.38)  |                  | 0.69 (0.36-1.34) |      |
|               | Log-additive  |                  | 1.77 (1.09-2.89)  | 0.019            | 0.98 (0.59-1.62) | 0.93 |
|               |               | Co-dominant      | C/C               | 1.00             | 0.07             | 1.00 |
|               | T/C           |                  | 1.98 (1.02-3.87)  |                  | 0.85 (0.42-1.70) |      |
|               | T/T           |                  | 2.83 (0.58-13.70) |                  | 1.22 (0.29-5.09) |      |
|               | Dominant      | C/C              | 1.00              | 0.023*           | 1.00             | 0.74 |
|               |               | T/C-T/T          | 2.07 (1.09-3.93)  |                  | 0.89 (0.46-1.73) |      |
|               | Recessive     | C/C-T/C          | 1.00              | 0.28             | 1.00             | 0.72 |
|               |               | T/T              | 2.29 (0.48-10.91) |                  | 1.29 (0.32-5.28) |      |
| rs555018      | Over-dominant | C/C-T/T          | 1.00              | 0.06             | 1.00             | 0.6  |
|               |               | T/C              | 1.87 (0.96-3.61)  |                  | 0.83 (0.42-1.66) |      |
|               | Log-additive  |                  | 1.86 (1.08-3.20)  | 0.022            | 0.96 (0.56-1.65) | 0.89 |
|               |               | Co-dominant      | T/T               | 1.00             | 0.07             | 1.00 |
|               | C/T           |                  | 1.98 (1.02-3.87)  |                  | 0.95 (0.48-1.91) |      |
|               | C/C           |                  | 2.83 (0.58-13.70) |                  | 1.27 (0.31-5.30) |      |
|               | Dominant      | T/T              | 1.00              | 0.023*           | 1.00             | 0.99 |
|               |               | C/T-C/C          | 2.07 (1.09-3.93)  |                  | 1.00 (0.52-1.92) |      |
|               | Recessive     | T/T-C/T          | 1.00              | 0.28             | 1.00             | 0.72 |
|               |               | C/C              | 2.29 (0.48-10.91) |                  | 1.29 (0.32-5.28) |      |
| rs11637635    | Over-dominant | T/T-C/C          | 1.00              | 0.06             | 1.00             | 0.85 |
|               |               | C/T              | 1.87 (0.96-3.61)  |                  | 0.94 (0.47-1.86) |      |
|               | Log-additive  |                  | 1.86 (1.08-3.20)  | 0.022            | 1.03 (0.60-1.77) | 0.9  |
|               |               | Co-dominant      | G/G               | 1.00             | 0.058            | 1.00 |
|               | G/A           |                  | 2.08 (1.04-4.15)  |                  | 0.83 (0.41-1.69) |      |
|               | A/A           |                  | 2.83 (0.58-13.70) |                  | 1.22 (0.29-5.06) |      |
|               | Dominant      | G/G              | 1.00              | 0.018*           | 1.00             | 0.71 |
|               |               | G/A-A/A          | 2.17 (1.12-4.19)  |                  | 0.88 (0.45-1.72) |      |
|               | Recessive     | G/G-G/A          | 1.00              | 0.28             | 1.00             | 0.72 |
|               |               | A/A              | 2.29 (0.48-10.91) |                  | 1.29 (0.32-5.28) |      |
| Over-dominant | G/G-A/A       | 1.00             | 0.048             | 1.00             | 0.57             |      |
|               | G/A           | 1.96 (0.99-3.88) |                   | 0.82 (0.41-1.65) |                  |      |
| Log-additive  |               | 1.91 (1.10-3.32) | 0.019             | 0.95 (0.55-1.64) | 0.87             |      |

\*A  $p$  value  $\leq 0.05$  indicates statistical significance; <sup>a</sup>adjusted by sex, age, and drinking status. Abbreviations: OR, odds ratio; CI, confidence interval.
